# Supplementary material
Source: ML conference proceedings conference paper supplement (https://openreview.net/forum?id=c01YB8pF0s)
Supplement: supplementary_material [file attachment]

# Appendix

## Table of Contents

---

|                                                                                                   |           |
|---------------------------------------------------------------------------------------------------|-----------|
| <b>A Notations</b>                                                                                | <b>16</b> |
| <b>B Space and Time Complexity Analysis</b>                                                       | <b>16</b> |
| <b>C Proof of Theorems</b>                                                                        | <b>17</b> |
| <b>D Data Preparation</b>                                                                         | <b>18</b> |
| D.1 Pre-processed Graphs for Training LGGMs . . . . .                                             | 18        |
| D.2 Preparing Graphs and Text Description About Their Domains/Names . . . . .                     | 18        |
| D.3 Preparing Graphs and Their Textual Description about Graph Property . . . . .                 | 20        |
| <b>E Experimental Setting</b>                                                                     | <b>21</b> |
| E.1 Evaluation Metrics . . . . .                                                                  | 21        |
| E.2 Hyperparameter Details . . . . .                                                              | 21        |
| E.3 Paradigm Setup . . . . .                                                                      | 21        |
| <b>F Full Experimental Results</b>                                                                | <b>22</b> |
| F.1 Out-of-domain Performance Comparison between DiGress and LGGM . . . . .                       | 22        |
| F.2 Performance Comparison between Fine-tuned DiGress and Fine-tuned LGGM . . . . .               | 23        |
| F.3 Performance Comparison between DiGress directly trained on X and Fine-tuned LGGM . . . . .    | 24        |
| F.4 Domain Transferability Analysis . . . . .                                                     | 25        |
| F.5 Equipping Large-scale Training Paradigm with another graph generative backbone EDGE . . . . . | 25        |
| F.6 Text-to-Graph Generation . . . . .                                                            | 26        |
| F.7 Sensitive Analysis on Number of Training Data under Domain Specific Transition . . . . .      | 27        |
| F.8 Sensitive Analysis on Number of Training Data under Uniform Transition Strategy . . . . .     | 28        |
| F.9 Comparing the Domain as the Textual Condition before/after shuffling . . . . .                | 29        |

---

## A NOTATIONS

This section summarizes the notations used throughout this paper.

Table 5: Notations used throughout this paper.

| Notations                                    | Definitions or Descriptions                                             |
|----------------------------------------------|-------------------------------------------------------------------------|
| $\mathbb{G}, \mathbb{G}^c$                   | Random variable of universal graphs and graphs from domain $c$          |
| $\mathcal{G}, \mathcal{G}^c$                 | Set of universal graphs and graphs from domain $c$                      |
| $\mathcal{G}^{\text{Train, Val, Test, } c}$  | Set of training/validation/testing graphs from domain $c$               |
| $P(\mathbb{G}), P(\mathbb{G}^c)$             | Distribution of universal graphs and graphs from domain $c$             |
| $G = (\mathbf{X}^G, \mathbf{E}^G)$           | Graph $G$ with node/edge category matrices $\mathbf{X}^G, \mathbf{E}^G$ |
| $n_G$                                        | Number of nodes in graph $G$                                            |
| $d_X/d_E$                                    | Number of node/edge categories                                          |
| $\mathbf{Q}_X^t, \mathbf{Q}_E^t$             | Node/edge transition matrices                                           |
| $\bar{\mathbf{Q}}_X^t, \bar{\mathbf{Q}}_E^t$ | Node/edge accumulative transition matrices                              |
| $\mathbf{m}_X^c, \mathbf{m}_E^c$             | Distribution of node/edge categories of graphs from domain $c$          |
| $t, \mathcal{T}$                             | Diffusion step $t$ and the set of total steps $\mathcal{T}$             |
| $\tilde{\mathbb{G}}$                         | Distribution of graphs from unseen domains                              |
| $\tilde{\mathcal{G}}$                        | Set of graphs from unseen domains                                       |
| $S, \phi(S)$                                 | Text with its embedding from the pre-trained textual encoder $\phi$     |
| $P(\mathbb{G}, \mathbb{S})$                  | Joint distribution of graphs and their textual descriptions             |
| $\Theta$                                     | Parameters of Neural Networks                                           |
| $\Theta^*$                                   | Optimal Parameters of Neural Networks after pre-training                |
| $\Theta^{**}$                                | Optimal Parameters of Neural Networks after fine-tuning                 |
| $\Theta^\square$                             | Optimal Parameters of Neural Networks after Text2Graph Generation       |
| FB, ASN                                      | Facebook Networks, Animal Social Networks                               |
| EMAIL, WEB                                   | Email Networks, Web Graphs                                              |
| ROAD, POWER                                  | Road Networks, Power Networks                                           |
| CHEM, BIO                                    | Chemical Networks, Biological Networks                                  |
| ECON, RT                                     | Economic Networks, Retweet Networks                                     |
| COL, ECO                                     | Collaboration Networks, Ecological Networks                             |
| CITATION                                     | Citation Networks                                                       |
| LGGM-X                                       | Pre-trained LGGM on all other domains except X                          |
| Fine-tuned LGGM on X                         | Fine-tuned LGGM-X on domain X                                           |
| LGGM-T2G                                     | LGGM trained on graphs paired with texts                                |
| LGGM-T2G <sup>D</sup>                        | LGGM trained on graphs with texts on domains                            |
| LGGM-T2G <sup>UP</sup>                       | LGGM trained on graphs with user prompts on domains/names               |
| LGGM                                         | LGGM trained on all graphs from all domains                             |

## B SPACE AND TIME COMPLEXITY ANALYSIS

Table 6: Our theoretical/empirical analysis of the DiGress and EDGE graph diffusion models, both with and without our Large Graph Training Scheme (LGGM). Incorporating LGGM only increases complexity linearly due to the added domains, aligning with the theoretical analysis.  $T$  - number of diffusion steps,  $\mathcal{V}/\mathcal{E}$  - number of nodes/edges,  $K$  - number of active nodes,  $C$  - number of domains.

| Backbone | Training Strategy | Theoretical Time Space Complexity          | Running Time per Epoch (s) with #Domains/#Graphs |            |            |             |             |
|----------|-------------------|--------------------------------------------|--------------------------------------------------|------------|------------|-------------|-------------|
|          |                   |                                            | 1/403                                            | 2/806      | 4/1219     | 8/2837      | 12/4492     |
| DiGress  | Original          | $\mathcal{O}(T \mathcal{V} ^2)$            | 19.12±0.03                                       | —          | —          | —           | —           |
|          | LGGM              | $\mathcal{O}(CT \mathcal{V} ^2)$           | 19.14±0.05                                       | 36.34±0.21 | 47.46±0.11 | 142.14±0.19 | 224.74±0.23 |
| EDGE     | Original          | $\mathcal{O}(T \max( \mathcal{E} , K^2))$  | 1.02±0.13                                        | —          | —          | —           | —           |
|          | LGGM              | $\mathcal{O}(CT \max( \mathcal{E} , K^2))$ | 1.07±0.18                                        | 1.92±0.26  | 5.42±0.09  | 11.59±0.20  | 19.48±0.22  |

## C PROOF OF THEOREMS

**Theorem 1.** *If the transition matrices  $\mathbf{Q}_X^t, \mathbf{Q}_E^t$  are independent of the textual description  $\mathbb{S}$ , then we have  $P(\mathbb{G}^{t-1}|\mathbb{G}^t, \mathbb{G}, \mathbb{S}) \propto P(\mathbb{G}^t|\mathbb{G}^{t-1})P(\mathbb{G}^{t-1}|\mathbb{G})$  and correspondingly, we have the analytical formed solution, i.e.,  $P(\mathbf{X}^{t-1}|\mathbf{X}^t, \mathbf{X}, S) \propto \mathbf{X}^t(\mathbf{Q}_X^t)^\top \odot \mathbf{X}\bar{\mathbf{Q}}_X^{t-1}$ ,  $P(\mathbf{E}^{t-1}|\mathbf{E}^t, \mathbf{E}, S) \propto \mathbf{E}^t(\mathbf{Q}_E^t)^\top \odot \mathbf{E}\bar{\mathbf{Q}}_E^{t-1}$  following Vignac et al. (2023).*

*Proof.* Applying the Bayes rule, we have:

$$P(\mathbb{G}^{t-1}|\mathbb{G}^t, \mathbb{G}, \mathbb{S}) \propto P(\mathbb{G}^{t-1}, \mathbb{G}^t, \mathbb{G}, \mathbb{S}) \propto P(\mathbb{G}^t|\mathbb{G}^{t-1}, \mathbb{G}, \mathbb{S})P(\mathbb{G}^{t-1}, \mathbb{G}, \mathbb{S}) \quad (6)$$

$$\propto P(\mathbb{G}^t|\mathbb{G}^{t-1}, \mathbb{G}, \mathbb{S})P(\mathbb{G}^{t-1}|\mathbb{G}, \mathbb{S})P(\mathbb{G}, \mathbb{S}). \quad (7)$$

Given the independence of the transition matrix on the textual description  $S$  and also the noise is Markovian Vignac et al. (2023), we have  $P(\mathbb{G}^t|\mathbb{G}^{t-1}, \mathbb{G}, \mathbb{S}) = P(\mathbb{G}^t|\mathbb{G}^{t-1})$ ,  $P(\mathbb{G}^{t-1}|\mathbb{G}, \mathbb{S}) = P(\mathbb{G}^{t-1}|\mathbb{G})$ , and also the irrelevance of  $P(\mathbb{G}, \mathbb{S})$  to  $P(\mathbb{G}^{t-1}|\mathbb{G}^t, \mathbb{G}, \mathbb{S})$ , we then end up with:

$$P(\mathbb{G}^{t-1}|\mathbb{G}^t, \mathbb{G}, \mathbb{S}) \propto P(\mathbb{G}^t|\mathbb{G}^{t-1})P(\mathbb{G}^{t-1}|\mathbb{G}). \quad (8)$$

Since the distribution of graphs can be decomposed into the distribution of node and edge categories, following Vignac et al. (2023), we similarly have:

$$P(\mathbf{X}^{t-1}|\mathbf{X}^t, \mathbf{X}, S) \propto P(\mathbf{X}^t|\mathbf{X}^{t-1})P(\mathbf{X}^{t-1}|\mathbf{X}) = \mathbf{X}^t(\mathbf{Q}_X^t)^\top \odot \mathbf{X}\bar{\mathbf{Q}}_X^{t-1}, \quad (9)$$

$$P(\mathbf{E}^{t-1}|\mathbf{E}^t, \mathbf{E}, S) \propto P(\mathbf{E}^t|\mathbf{E}^{t-1})P(\mathbf{E}^{t-1}|\mathbf{E}) = \mathbf{E}^t(\mathbf{Q}_E^t)^\top \odot \mathbf{E}\bar{\mathbf{Q}}_E^{t-1}. \quad (10)$$

□

**Theorem 2.** *Given the decomposition in Eq. (4) that  $P(\mathbb{G}^{t-1}|\mathbb{G}^t, \mathbb{S}) \propto \sum_{\mathbb{G}} P(\mathbb{G}^{t-1}|\mathbb{G}^t, \mathbb{G}, \mathbb{S})P(\mathbb{G}|\mathbb{G}^t, \mathbb{S})$ , optimizing  $\Theta$  according to Eq. (5) essentially optimizes the variational lower bound of the log-likelihood  $P_\Theta(\mathbb{G}^0, \mathbb{S})$ .*

*Proof.* We start directly from the log-likelihood of the joint distribution of  $P_\Theta(\mathbb{G}^0, \mathbb{S})$ :

$$\log P_\Theta(\mathbb{G}^0, \mathbb{S}) = \log \int P_\Theta(\mathbb{G}^0, \mathbb{S}, \mathbb{G}^1, \dots, \mathbb{G}^T) d(\mathbb{G}^1, \mathbb{G}^2, \dots, \mathbb{G}^T) \quad (11)$$

$$= \log \int \frac{P_\Theta(\mathbb{G}^0, \mathbb{S}, \mathbb{G}^1, \dots, \mathbb{G}^T)}{q(\mathbb{G}^1, \mathbb{G}^2, \dots, \mathbb{G}^T)} q(\mathbb{G}^1, \mathbb{G}^2, \dots, \mathbb{G}^T) d(\mathbb{G}^1, \mathbb{G}^2, \dots, \mathbb{G}^T) \quad (12)$$

$$= \log \mathbb{E}_{q(\mathbb{G}^1, \mathbb{G}^2, \dots, \mathbb{G}^T)} \frac{P_\Theta(\mathbb{G}^0, \mathbb{S}, \mathbb{G}^1, \dots, \mathbb{G}^T)}{q(\mathbb{G}^1, \mathbb{G}^2, \dots, \mathbb{G}^T)} \quad (13)$$

$$\geq \mathbb{E}_{q(\mathbb{G}^1, \mathbb{G}^2, \dots, \mathbb{G}^T)} \log \frac{P_\Theta(\mathbb{G}^0, \mathbb{S}, \mathbb{G}^1, \dots, \mathbb{G}^T)}{q(\mathbb{G}^1, \mathbb{G}^2, \dots, \mathbb{G}^T)} \quad \text{by Jensen's inequality} \quad (14)$$

$$= \mathbb{E}_{q(\mathbb{G}^1, \mathbb{G}^2, \dots, \mathbb{G}^T)} \log \frac{P(\mathbb{G}^T, \mathbb{S}) \prod_{t=1}^T P_\Theta(\mathbb{G}^{t-1}|\mathbb{G}^t, \mathbb{S})}{q(\mathbb{G}^1) \prod_{t=2}^T q(\mathbb{G}^t|\mathbb{G}^{t-1})} \quad \text{by Markovian} \quad (15)$$

$$= \mathbb{E}_{q(\mathbb{G}^0, \mathbb{G}^1, \dots, \mathbb{G}^T)} [\log P(\mathbb{G}^T, \mathbb{S}) + \sum_{t=1}^T \log \frac{P_\Theta(\mathbb{G}^{t-1}|\mathbb{G}^t, \mathbb{S})}{q(\mathbb{G}^t|\mathbb{G}^{t-1})}] + \text{const.} \quad (16)$$

According to the decomposition in Eq. (2), optimizing  $\Theta$  according to Eq. (5) leads to optimizing  $P_\Theta(\mathbb{G}^{t-1}|\mathbb{G}^t, \mathbb{S})$ , which corresponds to the second term in Eq. (16) and subsequently optimizes the variational lower bound of the log-likelihood  $P_\Theta(\mathbb{G}^0, \mathbb{S})$  according to the derivation from Eq. (11) to Eq. (16). Therefore, training Text-to-Graph LGGM according to Eq. (5) enables the model to generate graphs such that the pairs of texts and graphs end up with higher likelihoods.

□

## D DATA PREPARATION

### D.1 PRE-PROCESSED GRAPHS FOR TRAINING LGGMS

We select graphs from the Network Repository across 13 distinct yet representative domains covering a wide variety of real-world scenarios, including Facebook, Animal Social, Email, Web, Road, Power, Chemical, Biological, Economic, Retweet, Collaboration, Ecological, and Citation. Due to the scalability with diffusion-based graph generative models, we further sample subgraphs for certain domains, and Table 7 presents the comprehensive statistics of the sampled subgraphs, which are used for training LGGMs. We can see that graphs from different domains are statistically different.

Table 7: Summary of Graph Statistics. Facebook (FB), Animal Social (ASN), Email, Web, Road, Power, Chemical (CHEM), Biological (BIO), Economic (ECON), Retweet (RT), Collaboration (COL), Ecological (ECO), Citation.

| Category | Num Nodes          | Num Edges             | Avg Degree        | Avg Clustering    | Max Nodes | Min Nodes | Max Edges | Min Edges | Num Graphs |
|----------|--------------------|-----------------------|-------------------|-------------------|-----------|-----------|-----------|-----------|------------|
| ASN      | 52.47 $\pm$ 40.13  | 77.59 $\pm$ 80.95     | 2.62 $\pm$ 1.52   | 0.395 $\pm$ 0.178 | 283       | 3         | 515       | 2         | 267        |
| BIO      | 191.14 $\pm$ 43.47 | 965.71 $\pm$ 878.35   | 9.16 $\pm$ 7.69   | 0.276 $\pm$ 0.199 | 258       | 109       | 4392      | 96        | 504        |
| CHEM     | 36.46 $\pm$ 20.49  | 64.61 $\pm$ 26.23     | 3.75 $\pm$ 0.63   | 0.421 $\pm$ 0.223 | 125       | 2         | 149       | 1         | 646        |
| Citation | 235.91 $\pm$ 27.25 | 1287.16 $\pm$ 1087.00 | 10.17 $\pm$ 8.14  | 0.369 $\pm$ 0.224 | 270       | 175       | 4474      | 188       | 504        |
| COL      | 174.26 $\pm$ 53.82 | 312.56 $\pm$ 176.33   | 3.41 $\pm$ 1.24   | 0.497 $\pm$ 0.203 | 247       | 52        | 996       | 68        | 504        |
| ECO      | 100.67 $\pm$ 30.10 | 1490.00 $\pm$ 673.87  | 27.72 $\pm$ 7.00  | 0.406 $\pm$ 0.082 | 128       | 54        | 2106      | 353       | 6          |
| ECON     | 144.18 $\pm$ 35.82 | 3258.76 $\pm$ 3540.28 | 39.76 $\pm$ 37.80 | 0.419 $\pm$ 0.296 | 219       | 90        | 11142     | 188       | 504        |
| Email    | 146.67 $\pm$ 35.86 | 681.55 $\pm$ 500.28   | 9.79 $\pm$ 7.26   | 0.389 $\pm$ 0.211 | 213       | 82        | 2909      | 216       | 504        |
| Power    | 132.22 $\pm$ 20.29 | 289.32 $\pm$ 183.02   | 4.35 $\pm$ 2.31   | 0.161 $\pm$ 0.164 | 187       | 81        | 1332      | 133       | 512        |
| Road     | 265.25 $\pm$ 94.31 | 276.46 $\pm$ 79.61    | 2.70 $\pm$ 2.08   | 0.078 $\pm$ 0.134 | 411       | 32        | 456       | 137       | 504        |
| RT       | 104.11 $\pm$ 35.23 | 110.99 $\pm$ 46.44    | 2.11 $\pm$ 0.37   | 0.028 $\pm$ 0.038 | 175       | 35        | 295       | 34        | 558        |
| FB       | 219.45 $\pm$ 47.05 | 1863.44 $\pm$ 701.53  | 16.36 $\pm$ 6.17  | 0.315 $\pm$ 0.083 | 259       | 48        | 3898      | 46        | 504        |
| Web      | 173.32 $\pm$ 24.86 | 462.21 $\pm$ 336.46   | 5.09 $\pm$ 3.06   | 0.404 $\pm$ 0.196 | 231       | 119       | 1607      | 149       | 504        |

### D.2 PREPARING GRAPHS AND TEXT DESCRIPTION ABOUT THEIR DOMAINS/NAMES

Here we thoroughly discuss the process of obtaining graphs and their corresponding text prompts describing their domains/names. As given by the Network Repository, we directly download graphs along with their domains/names. We then prompt GPT3.5 to generate user prompts describing the graph given its domain/name. The concrete prompt template we use here is shown in Listing 1 with exemplary generated user prompts shown in Listing 2. Moreover, we apply the sentence transformer to obtain text embeddings of the generated prompts for each network and perform t-SNE visualization. As shown in Figure 7a, we see prompts for graphs from different domains from different clusters. More importantly, textual similarity can somewhat reflect their network similarity. For example, prompts for road and power networks are very close, and they both belong to infrastructure. Moreover, Facebook Networks, Email Networks, Collaboration Networks, Web Graphs are very close since all these four belong to some sub-variants of social networks. *This inherent relationship between the textual similarity and structural similarity between two graphs demonstrates that the world knowledge encoded in the text could somehow provide useful preference for the graphs to be generated.*

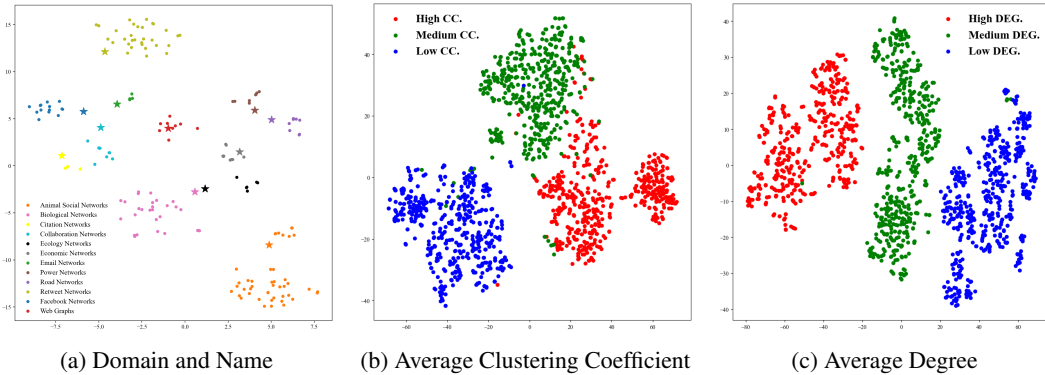

Figure 7: t-SNE visualization of textual description about network (a) domain/name (b) average clustering coefficient (c) average degree.

## Listing 1: Prompt Template for Generating Textual Description about Network Domain/Name.

PROMPT: Given a graph called {GRAPH NAME} that is from the DOMAIN {DOMAIN NAME}. Please generate a short sentence about the graph.

Note:

\* Do not generate more than 20 words.

## Listing 2: Examples of Textual Description about Network Domain/Name.

```
=====
*DOMAIN: Animal Social Networks
*NAME: reptilia-tortoise-network-sl
*TEXT: The reptilia-tortoise-network-sl graph represents the social connections among tortoises in the
       reptile community.
=====
*DOMAIN: Power Networks
*NAME: power-eris1176
*TEXT: The power-eris1176 graph represents the interconnected nodes and edges of a power network system
=====
*DOMAIN: Economic Networks
*NAME: econ-poli
*TEXT: The econ-poli graph represents the interconnectedness of economic and political factors in a
       network.
=====
*DOMAIN: Ecology Networks
*NAME: eco-evergla
*TEXT: The eco-evergla graph represents the interconnectedness of species in the Everglades ecosystem.
=====
*DOMAIN: Email Networks
*NAME: email-enron-only
*TEXT: The email-enron-only graph represents the network of email communication within the Enron
       corporation.
=====
*DOMAIN: Road Networks
*NAME: road-roadNet-CA
*TEXT: The road-roadNet-CA graph represents the road network in California.
=====
*DOMAIN: Retweet Networks
*NAME: rt_occupywallstnyc
*TEXT: The graph rt_occupywallstnyc represents retweet relationships in the Occupy Wall Street movement
       in New York City.
=====
*DOMAIN: Facebook Networks
*NAME: socfb-Haverford76
*TEXT: The socfb-Haverford76 graph represents the social connections among users in the Haverford
       College community on Facebook.
=====
*DOMAIN: Web Graphs
*NAME: web-wiki-chameleon
*TEXT: The web-wiki-chameleon graph represents the interconnections between web pages, Wikipedia
       articles, and chameleon species.
=====
*DOMAIN: Biological Networks
*NAME: bio-WormNet-v3-benchmark
*TEXT: The bio-WormNet-v3-benchmark graph represents a biological network related to worms.
=====
*DOMAIN: Citation Networks
*NAME: cit-DBLP
*TEXT: cit-DBLP is a graph representing the citation relationships between research papers in the field of
       computer science.
=====
*DOMAIN: Collaboration Networks
*NAME: ca-netscienc
*TEXT: The ca-netscienc graph represents a collaboration network in the field of science.
=====
```

### D.3 PREPARING GRAPHS AND THEIR TEXTUAL DESCRIPTION ABOUT GRAPH PROPERTY

Here we thoroughly discuss the process of obtaining graphs and their corresponding text prompts describing their properties. Our goal is to demonstrate that Text2Graph LGGM can control the statistics of the generated graphs in the full spectrum. However, the graphs obtained directly from the Network Repository do not cover the whole topological space (e.g., Figure 1(a) shows that no networks have a higher average degree while low clustering coefficient). Therefore, we plan to synthesize graphs covering the whole space by Watts-Strogatz Small-world Graph Model. We vary the number of nodes between [10, 110], the number of initial neighbors between [5, number of nodes], and also the probability of rewiring each edge between [0, 1] to ensure the generated graphs span across the full spectrum. After that, we group the generated graphs into low, medium, and high groups in terms of their clustering coefficient and average degree. We implement this using NetworkX.

After we synthesize graphs and divide them into three groups, we generate user prompts paired with these graphs next. Specifically, we prompt GPT4 following the templates in Listing 3/4. To ensure the compatibility between the synthesis graphs and the generated user prompts. We further replace the number output by GPT4 describing the network property with the real statistic calculated from each network.

Listing 3: Prompt Template for Generating Textual Description about Network Property.

```
=====
PROMPT: Please generate a short sentence about the graph, including its clustering coefficient information.
```

```
Note:
```

- \* Do not generate more than 20 words.
- \* Make sure the generated sentence includes the level of clustering coefficient, you can either specify it via words like ['low', 'medium', 'high']. or specify it via numbers like [(0, 0.25), (0.25, 0.5), (0.5, 0.75)]"
- \* You can also sometimes specify a concrete application scenario of the generated network.
- \* Please be accurate but also diverse

```
=====
PROMPT: Please generate a short sentence about the graph, including its average degree information.
```

```
Note:
```

- \* Do not generate more than 20 words.
- \* Make sure the generated sentence includes the level of average degree, you can either specify it via words like ['low', 'medium', 'high']. or specify it via numbers like [(0, 20), (20, 50), (50, 100)]"
- \* You can also sometimes specify a concrete application scenario of the generated network.
- \* Please be accurate but also diverse

Listing 4: Examples of Textual Description about Network Property.

- ```
=====
```
- \* This graph has a high clustering coefficient, suggesting strong node clustering.
  - \* Please generate a network with a clustering coefficient around 0.61, indicating strong clustering.
  - \* This retirement community's social interaction graph displays a high clustering coefficient of 0.73, indicative of close relationships.
- ```
=====
```
- \* With an average degree of 35, this network is ideal for studying urban transportation patterns.
  - \* The graph's moderate connectivity level helps in understanding the structure of small to medium-sized music bands.
  - \* An average degree of 41 makes this network suitable for simulating the collaboration in local artisan markets.
- ```
=====
```

## E EXPERIMENTAL SETTING

### E.1 EVALUATION METRICS

Following [Thompson et al. \(2022\)](#); [You et al. \(2018\)](#), we evaluate the graph generation performance by the standard Maximum Mean Discrepancy (MMD) between generated and reference graphs  $\mathcal{G}_g, \mathcal{G}_r$ :

$$\text{MMD}(\mathcal{G}_g, \mathcal{G}_r) = \frac{1}{m^2} \sum_{i,j=1}^m k(\mathbf{x}_i^r, \mathbf{x}_j^r) + \frac{1}{n^2} \sum_{i,j=1}^n k(\mathbf{x}_i^g, \mathbf{x}_j^g) - \frac{2}{nm} \sum_{i=1}^n \sum_{j=1}^m k(\mathbf{x}_i^g, \mathbf{x}_j^r), \quad (17)$$

where  $k(\cdot, \cdot)$  is a general kernel function and specifically we use RBF kernel following [You et al. \(2018\)](#):

$$k(\mathbf{x}_i, \mathbf{x}_j) = \exp(-d(\mathbf{x}_i, \mathbf{x}_j)/2\sigma^2), \quad (18)$$

where  $d(\cdot, \cdot)$  computes pairwise distance following [Vignac et al. \(2023\)](#) and MMD is evaluated over the distributions of degree (DEG), clustering coefficients (CC), eigenvalues of normalized Laplacian matrix (Spec) and orbits counts representing the distribution of all substructures of size 4 (Orb).

### E.2 HYPERPARAMETER DETAILS

For all experiments, we select the best configuration according to the generation performance on validation graphs and report the final performance on generating testing graphs. We adopt the default hyperparameter settings from DiGress [Vignac et al. \(2023\)](#) with the following exceptions: we generate 100 graphs per domain for each evaluation and set the training epochs at 300 to ensure convergence. Additionally, we implement gradient accumulation, using a mini-batch size of 12 across 4 accumulations, resulting in an effective batch size of 48. For Text-to-Graph Generation, the textual encoder used to obtain textual description embeddings is "all-MiniLM-L6-v2". All experiments are performed on a machine with A100-80G GPU RAM and 128GB RAM.

### E.3 PARADIGM SETUP

Figure 8 comprehensively visualizes the training/evaluation paradigms of the four experiments, the details of which are discussed in Section 5.1.

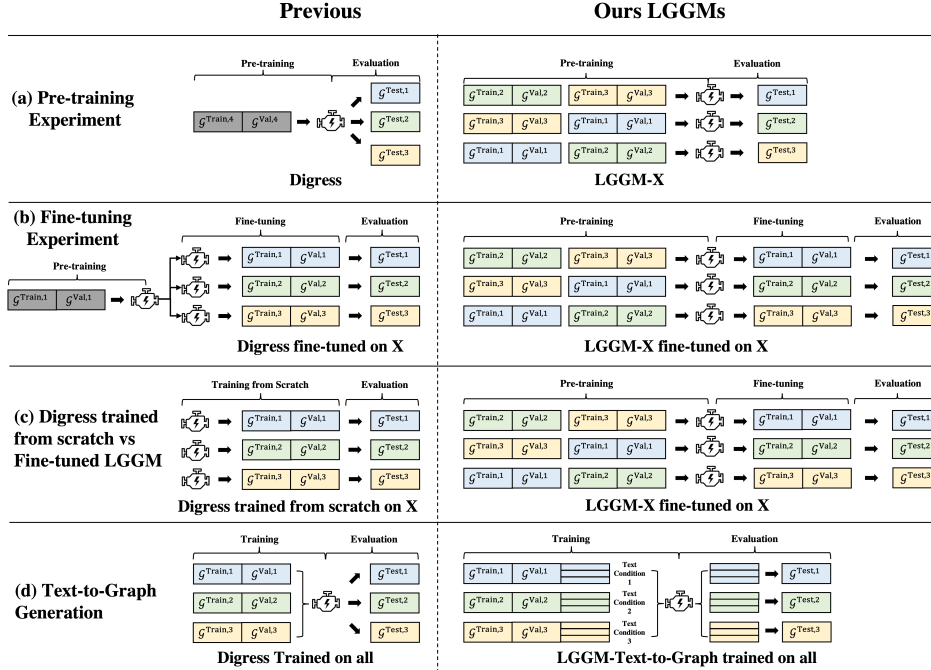

Figure 8: Comprehensive Overview of the Experimental Setup for our LGGMs.

## F FULL EXPERIMENTAL RESULTS

### F.1 OUT-OF-DOMAIN PERFORMANCE COMPARISON BETWEEN DIGRESS AND LGGM

#### F.1.1 DOMAIN SPECIFIC TRANSITION STRATEGY

Table 8: Comparing Zero-shot Generation Performance on Unseen Graphs in domain X between DiGress trained on QM9 and LGGM-X pre-trained on all domains except the held-out domain X.

| Domain | Method  | DEG           | CC            | Spec          | Orb           | Domain   | Method  | DEG           | CC            | Spec          | Orb           |
|--------|---------|---------------|---------------|---------------|---------------|----------|---------|---------------|---------------|---------------|---------------|
| FB     | DiGress | <b>0.2695</b> | <b>0.3452</b> | <b>0.0649</b> | <b>0.1489</b> | BIO      | DiGress | 0.2419        | <b>0.2993</b> | <b>0.1101</b> | <b>0.2978</b> |
|        | LGGM-X  | 0.4962        | 0.7625        | 0.3408        | 0.7982        |          | LGGM-X  | <b>0.2117</b> | 0.6365        | 0.1690        | 0.5156        |
| ASN    | DiGress | 0.1793        | 0.4721        | 0.1751        | 0.5654        | ECON     | DiGress | 0.2811        | 0.2042        | 0.2028        | 0.2633        |
|        | LGGM-X  | <b>0.0220</b> | <b>0.4044</b> | <b>0.1274</b> | <b>0.0505</b> |          | LGGM-X  | <b>0.1916</b> | <b>0.0917</b> | <b>0.1219</b> | <b>0.0640</b> |
| EMAIL  | DiGress | <b>0.2312</b> | <b>0.5444</b> | <b>0.0674</b> | <b>0.2650</b> | RT       | DiGress | 0.4466        | 0.4170        | 0.4483        | 0.4551        |
|        | LGGM-X  | 0.2618        | 0.8650        | 0.3013        | 1.0459        |          | LGGM-X  | <b>0.0721</b> | <b>0.0517</b> | <b>0.2331</b> | <b>0.4085</b> |
| WEB    | DiGress | 0.2575        | <b>0.5955</b> | 0.1907        | 0.9282        | COL      | DiGress | 0.2393        | <b>0.5341</b> | 0.2247        | 0.7619        |
|        | LGGM-X  | <b>0.1491</b> | 0.9436        | <b>0.1154</b> | <b>0.4016</b> |          | LGGM-X  | <b>0.1493</b> | 0.9200        | <b>0.1786</b> | <b>0.2057</b> |
| ROAD   | DiGress | 0.4111        | 0.6653        | 0.3084        | 0.6530        | ECO      | DiGress | 0.4580        | 0.4546        | 0.2144        | 0.4417        |
|        | LGGM-X  | <b>0.0379</b> | <b>0.1191</b> | <b>0.0759</b> | <b>0.0401</b> |          | LGGM-X  | <b>0.2049</b> | <b>0.2760</b> | <b>0.0691</b> | <b>0.2107</b> |
| POWER  | DiGress | 0.5292        | <b>0.6083</b> | 0.3556        | 1.2124        | CITATION | DiGress | 0.3159        | <b>0.3664</b> | 0.1299        | <b>0.2278</b> |
|        | LGGM-X  | <b>0.0343</b> | 0.6290        | <b>0.0649</b> | <b>0.0228</b> |          | LGGM-X  | <b>0.1314</b> | 0.8908        | <b>0.1188</b> | 0.6391        |
| ALL    | DiGress | 0.3217        | <b>0.4589</b> | 0.2077        | 0.5184        |          |         |               |               |               |               |
|        | LGGM-X  | <b>0.1635</b> | 0.5492        | <b>0.1597</b> | <b>0.3669</b> |          |         |               |               |               |               |

#### F.1.2 UNIFORM TRANSITION STRATEGY

Table 9: Comparing Zero-shot Generation Performance on Unseen Graphs in domain X between DiGress trained on QM9 and LGGM-X pre-trained on all domains except the held-out domain X.

| Domain | Method  | DEG           | CC            | Spec          | Orb           | Domain   | Method  | DEG           | CC            | Spec          | Orb           |
|--------|---------|---------------|---------------|---------------|---------------|----------|---------|---------------|---------------|---------------|---------------|
| FB     | DiGress | <b>0.3376</b> | <b>0.6298</b> | <b>0.0797</b> | <b>0.3593</b> | BIO      | DiGress | 0.2712        | 0.5202        | 0.1127        | 0.3188        |
|        | LGGM-X  | 0.4723        | 0.6843        | 0.2924        | 0.7555        |          | LGGM-X  | <b>0.1081</b> | <b>0.2696</b> | <b>0.0900</b> | <b>0.2053</b> |
| ASN    | DiGress | 0.1496        | 0.3258        | 0.1506        | 0.4420        | ECON     | DiGress | 0.2987        | 0.4841        | 0.2162        | 0.3834        |
|        | LGGM-X  | <b>0.0281</b> | <b>0.2440</b> | <b>0.0830</b> | <b>0.0618</b> |          | LGGM-X  | <b>0.1213</b> | <b>0.0920</b> | <b>0.1120</b> | <b>0.1086</b> |
| EMAIL  | DiGress | 0.2192        | 0.6012        | 0.0702        | 0.3416        | RT       | DiGress | 0.4164        | 0.1327        | 0.4147        | 0.5957        |
|        | LGGM-X  | <b>0.0751</b> | <b>0.2364</b> | <b>0.0768</b> | <b>0.3089</b> |          | LGGM-X  | <b>0.0525</b> | <b>0.1429</b> | <b>0.1330</b> | <b>0.2219</b> |
| WEB    | DiGress | 0.2556        | 0.6186        | 0.1877        | 0.6045        | COL      | DiGress | 0.2473        | 0.5826        | 0.2314        | 0.7679        |
|        | LGGM-X  | <b>0.0648</b> | <b>0.3961</b> | <b>0.0549</b> | <b>0.1127</b> |          | LGGM-X  | <b>0.0736</b> | <b>0.5769</b> | <b>0.0895</b> | <b>0.0988</b> |
| ROAD   | DiGress | 0.3705        | 0.8226        | 0.2801        | 0.7198        | ECO      | DiGress | 0.5431        | 0.7915        | 0.2338        | 0.6045        |
|        | LGGM-X  | <b>0.0713</b> | <b>0.2193</b> | <b>0.0987</b> | <b>0.2986</b> |          | LGGM-X  | <b>0.4753</b> | <b>0.3904</b> | 0.3194        | <b>0.3934</b> |
| POWER  | DiGress | 0.3726        | 0.4582        | 0.3270        | 1.4732        | CITATION | DiGress | 0.2527        | 0.7790        | 0.1315        | <b>0.4966</b> |
|        | LGGM-X  | <b>0.0119</b> | <b>0.1293</b> | <b>0.0373</b> | <b>0.0754</b> |          | LGGM-X  | <b>0.1348</b> | <b>0.7257</b> | <b>0.1160</b> | 0.4981        |
| ALL    | DiGress | 0.3112        | 0.5622        | 0.2030        | 0.5923        |          |         |               |               |               |               |
|        | LGGM-X  | <b>0.1408</b> | <b>0.3422</b> | <b>0.1253</b> | <b>0.2616</b> |          |         |               |               |               |               |



## F.2 PERFORMANCE COMPARISON BETWEEN FINE-TUNED DIGRESS AND FINE-TUNED LGGM

## F.2.1 DOMAIN SPECIFIC TRANSITION STRATEGY

Table 10: Comparing Graph Generation Performance between Fine-tuned DiGress and Fine-tuned LGGM on each domain. DiGress-FT: DiGress pre-trained on QM9 and fine-tuned on domain X; LGGM-FT: LGGM pre-trained on all other domains except X and fine-tuned on X under **Domain Specific Transition Strategy**.

| Domain | Method     | DEG           | CC            | Spec          | Orb           | Domain   | Method     | DEG           | CC            | Spec          | Orb           |
|--------|------------|---------------|---------------|---------------|---------------|----------|------------|---------------|---------------|---------------|---------------|
| FB     | DiGress-FT | 0.0159        | 0.0564        | 0.0082        | 0.0298        | BIO      | DiGress-FT | 0.0391        | 0.0354        | 0.0347        | 0.0291        |
|        | LGGM-FT    | <b>0.0065</b> | <b>0.0544</b> | <b>0.0069</b> | <b>0.0282</b> |          | LGGM-FT    | <b>0.0036</b> | <b>0.0303</b> | <b>0.0102</b> | <b>0.0342</b> |
| ASN    | DiGress-FT | 0.0189        | 0.0775        | 0.0729        | 0.0886        | ECON     | DiGress-FT | 0.0301        | 0.0431        | 0.0372        | 0.0392        |
|        | LGGM-FT    | <b>0.0014</b> | <b>0.0509</b> | <b>0.0161</b> | <b>0.0084</b> |          | LGGM-FT    | <b>0.0215</b> | <b>0.0330</b> | <b>0.0062</b> | <b>0.0249</b> |
| EMAIL  | DiGress-FT | 0.0208        | 0.0448        | 0.0230        | <b>0.0447</b> | RT       | DiGress-FT | 0.0054        | 0.0464        | 0.0051        | 0.0437        |
|        | LGGM-FT    | <b>0.0166</b> | <b>0.0364</b> | <b>0.0104</b> | 0.0463        |          | LGGM-FT    | <b>0.0012</b> | <b>0.0075</b> | <b>0.0033</b> | <b>0.0162</b> |
| WEB    | DiGress-FT | 0.0192        | 0.0808        | 0.0664        | 0.1361        | COL      | DiGress-FT | 0.0255        | 0.2279        | 0.0788        | 0.0731        |
|        | LGGM-FT    | <b>0.0116</b> | <b>0.0721</b> | <b>0.0152</b> | <b>0.0656</b> |          | LGGM-FT    | <b>0.0202</b> | <b>0.1621</b> | <b>0.0571</b> | <b>0.0631</b> |
| ROAD   | DiGress-FT | 0.0907        | 0.1404        | 0.1099        | 0.1097        | ECO      | DiGress-FT | 0.1370        | 0.2747        | 0.0476        | 0.2109        |
|        | LGGM-FT    | <b>0.0088</b> | <b>0.1349</b> | <b>0.0347</b> | <b>0.0125</b> |          | LGGM-FT    | <b>0.0196</b> | <b>0.2343</b> | <b>0.0291</b> | <b>0.2100</b> |
| POWER  | DiGress-FT | 0.0104        | 0.2197        | 0.1023        | 0.0445        | CITATION | DiGress-FT | 0.0363        | 0.1140        | 0.0469        | 0.0423        |
|        | LGGM-FT    | <b>0.0008</b> | <b>0.1539</b> | <b>0.0215</b> | <b>0.0081</b> |          | LGGM-FT    | <b>0.0078</b> | <b>0.0827</b> | <b>0.0137</b> | <b>0.0316</b> |
| All    | DiGress-FT | 0.0374        | 0.1134        | 0.0528        | 0.0743        |          |            |               |               |               |               |
|        | LGGM-FT    | <b>0.0010</b> | <b>0.0877</b> | <b>0.0187</b> | <b>0.0458</b> |          |            |               |               |               |               |

## F.2.2 UNIFORM TRANSITION STRATEGY

Table 11: Comparing Graph Generation Performance between Fine-tuned DiGress and Fine-tuned LGGM on each domain. DiGress-FT: DiGress pre-trained on QM9 and fine-tuned on domain X; LGGM-FT: LGGM pre-trained on all other domains except X and fine-tuned on X under **Uniform Transition Strategy**.

| Domain | Method     | DEG           | CC            | Spec          | Orb           | Domain   | Method     | DEG           | CC            | Spec          | Orb           |
|--------|------------|---------------|---------------|---------------|---------------|----------|------------|---------------|---------------|---------------|---------------|
| FB     | DiGress-FT | <b>0.0039</b> | 0.0650        | 0.0090        | 0.0304        | BIO      | DiGress-FT | 0.0274        | 0.0845        | 0.0493        | 0.0312        |
|        | LGGM-FT    | <b>0.0050</b> | <b>0.0579</b> | <b>0.0059</b> | <b>0.0280</b> |          | LGGM-FT    | <b>0.0049</b> | <b>0.0496</b> | <b>0.0056</b> | <b>0.0257</b> |
| ASN    | DiGress-FT | 0.0249        | 0.5604        | 0.0779        | 0.0348        | ECON     | DiGress-FT | <b>0.0133</b> | <b>0.0355</b> | 0.0223        | <b>0.0360</b> |
|        | LGGM-FT    | <b>0.0058</b> | <b>0.1098</b> | <b>0.0311</b> | <b>0.0101</b> |          | LGGM-FT    | 0.0597        | 0.0594        | <b>0.0216</b> | 0.0535        |
| EMAIL  | DiGress-FT | 0.0134        | 0.0709        | 0.0223        | 0.0694        | RT       | DiGress-FT | 0.0418        | 0.0243        | 0.0495        | 0.0583        |
|        | LGGM-FT    | <b>0.0120</b> | <b>0.0559</b> | <b>0.0158</b> | <b>0.0444</b> |          | LGGM-FT    | <b>0.0032</b> | <b>0.0163</b> | <b>0.0051</b> | <b>0.0227</b> |
| WEB    | DiGress-FT | 0.0327        | 0.2025        | 0.0858        | 0.2033        | COL      | DiGress-FT | <b>0.0562</b> | 0.7070        | <b>0.1086</b> | 0.1471        |
|        | LGGM-FT    | <b>0.0218</b> | <b>0.1398</b> | <b>0.0310</b> | <b>0.1262</b> |          | LGGM-FT    | 0.1074        | <b>0.4265</b> | 0.1398        | <b>0.0897</b> |
| ROAD   | DiGress-FT | 0.0843        | 0.1010        | 0.1873        | 0.5155        | ECO      | DiGress-FT | 0.1118        | 0.3016        | 0.0548        | 0.2102        |
|        | LGGM-FT    | <b>0.0081</b> | <b>0.0547</b> | <b>0.0573</b> | <b>0.0228</b> |          | LGGM-FT    | <b>0.0204</b> | <b>0.2347</b> | <b>0.0404</b> | <b>0.2100</b> |
| POWER  | DiGress-FT | 0.0231        | 0.1029        | 0.0683        | 0.0441        | CITATION | DiGress-FT | 0.0277        | 0.1622        | 0.0501        | 0.0813        |
|        | LGGM-FT    | <b>0.0077</b> | <b>0.0570</b> | <b>0.0134</b> | <b>0.0040</b> |          | LGGM-FT    | <b>0.0052</b> | <b>0.0821</b> | <b>0.0221</b> | <b>0.0443</b> |
| All    | DiGress-FT | 0.0384        | 0.2015        | 0.0654        | 0.1218        |          |            |               |               |               |               |
|        | LGGM-FT    | <b>0.0218</b> | <b>0.1120</b> | <b>0.0324</b> | <b>0.0568</b> |          |            |               |               |               |               |

### F.3 PERFORMANCE COMPARISON BETWEEN DIGRESS DIRECTLY TRAINED ON X AND FINE-TUNED LGGM

#### F.3.1 DOMAIN SPECIFIC TRANSITION

Table 12: Comparing Graph Generation Performance between DiGress and Fine-tuned LGGM on each domain. DiGress: DiGress trained directly on domain X; LGGM-FT: LGGM pre-trained on all other domains except X and fine-tuned on X under **Domain Specific Transition Strategy**.

| Domain | Method  | DEG           | CC            | Spec          | Orb           | Domain   | Method  | DEG           | CC            | Spec          | Orb           |
|--------|---------|---------------|---------------|---------------|---------------|----------|---------|---------------|---------------|---------------|---------------|
| FB     | DiGress | 0.0423        | 0.0718        | 0.0243        | 0.0298        | BIO      | DiGress | 0.0481        | 0.1286        | 0.0487        | 0.0460        |
|        | LGGM-FT | <b>0.0065</b> | <b>0.0544</b> | <b>0.0069</b> | <b>0.0282</b> |          | LGGM-FT | <b>0.0036</b> | <b>0.0303</b> | <b>0.0102</b> | <b>0.0342</b> |
| ASN    | DiGress | 0.0319        | 0.0835        | 0.0679        | 0.1463        | ECON     | DiGress | 0.0224        | 0.0361        | 0.0084        | 0.0325        |
|        | LGGM-FT | <b>0.0014</b> | <b>0.0509</b> | <b>0.0161</b> | <b>0.0084</b> |          | LGGM-FT | <b>0.0215</b> | <b>0.0330</b> | <b>0.0062</b> | <b>0.0249</b> |
| EMAIL  | DiGress | <b>0.0145</b> | 0.0671        | 0.0143        | 0.0558        | RT       | DiGress | 0.0035        | 0.0111        | 0.0094        | 0.0207        |
|        | LGGM-FT | 0.0166        | <b>0.0364</b> | <b>0.0104</b> | <b>0.0463</b> |          | LGGM-FT | <b>0.0012</b> | <b>0.0075</b> | <b>0.0033</b> | <b>0.0162</b> |
| WEB    | DiGress | 0.0204        | 0.0778        | 0.0695        | 0.1101        | COL      | DiGress | 0.0278        | 0.2192        | 0.0669        | 0.0284        |
|        | LGGM-FT | <b>0.0116</b> | <b>0.0721</b> | <b>0.0152</b> | <b>0.0656</b> |          | LGGM-FT | <b>0.0202</b> | <b>0.1621</b> | <b>0.0571</b> | <b>0.0631</b> |
| ROAD   | DiGress | 0.0333        | <b>0.1342</b> | 0.0932        | 0.0861        | ECO      | DiGress | 0.0268        | 0.2356        | 0.0339        | 0.2100        |
|        | LGGM-FT | <b>0.0088</b> | 0.1349        | <b>0.0347</b> | <b>0.0125</b> |          | LGGM-FT | <b>0.0196</b> | <b>0.2343</b> | <b>0.0291</b> | <b>0.2100</b> |
| POWER  | DiGress | 0.0143        | 0.2050        | 0.0776        | 0.0392        | CITATION | DiGress | 0.0406        | 0.1790        | 0.0677        | 0.0944        |
|        | LGGM-FT | <b>0.0008</b> | <b>0.1539</b> | <b>0.0215</b> | <b>0.0081</b> |          | LGGM-FT | <b>0.0078</b> | <b>0.0827</b> | <b>0.0137</b> | <b>0.0316</b> |
| All    | DiGress | 0.0272        | 0.1208        | 0.0485        | 0.0749        |          | DiGress |               |               |               |               |
|        | LGGM-FT | <b>0.0100</b> | <b>0.0877</b> | <b>0.0187</b> | <b>0.0458</b> |          | LGGM-FT |               |               |               |               |

#### F.3.2 UNIFORM TRANSITION

Table 13: Comparing Graph Generation Performance between DiGress and Fine-tuned LGGM on each domain. DiGress: DiGress trained directly on domain X; LGGM-FT: LGGM pre-trained on all other domains except X and fine-tuned on X under **Uniform Transition Strategy**.

| Domain | Method  | DEG           | CC            | Spec          | Orb           | Domain   | Method  | DEG           | CC            | Spec          | Orb           |
|--------|---------|---------------|---------------|---------------|---------------|----------|---------|---------------|---------------|---------------|---------------|
| FB     | DiGress | 0.0177        | 0.0698        | 0.0138        | 0.0296        | BIO      | DiGress | 0.0179        | 0.0499        | 0.0441        | 0.0526        |
|        | LGGM-FT | <b>0.0050</b> | <b>0.0579</b> | <b>0.0059</b> | <b>0.0280</b> |          | LGGM-FT | <b>0.0049</b> | <b>0.0496</b> | <b>0.0056</b> | <b>0.0257</b> |
| ASN    | DiGress | 0.0337        | 0.1744        | 0.0482        | 0.0243        | ECON     | DiGress | <b>0.0229</b> | <b>0.0430</b> | <b>0.0088</b> | <b>0.0427</b> |
|        | LGGM-FT | <b>0.0058</b> | <b>0.1098</b> | <b>0.0311</b> | <b>0.0101</b> |          | LGGM-FT | 0.0597        | 0.0594        | 0.0216        | 0.0535        |
| EMAIL  | DiGress | 0.0259        | 0.0901        | 0.0366        | 0.0743        | RT       | DiGress | 0.0336        | 0.0920        | 0.0432        | 0.0572        |
|        | LGGM-FT | <b>0.0120</b> | <b>0.0559</b> | <b>0.0158</b> | <b>0.0444</b> |          | LGGM-FT | <b>0.0032</b> | <b>0.0163</b> | <b>0.0051</b> | <b>0.0227</b> |
| WEB    | DiGress | 0.0239        | <b>0.0898</b> | 0.1033        | 0.2371        | COL      | DiGress | <b>0.0252</b> | 0.5156        | <b>0.1171</b> | 0.2060        |
|        | LGGM-FT | <b>0.0218</b> | 0.1398        | <b>0.0310</b> | <b>0.1262</b> |          | LGGM-FT | 0.1074        | <b>0.4265</b> | 0.1398        | <b>0.0897</b> |
| ROAD   | DiGress | 0.1553        | 0.2788        | 0.2169        | 0.0542        | ECO      | DiGress | 0.0263        | 0.2359        | 0.0439        | 0.2100        |
|        | LGGM-FT | <b>0.0081</b> | <b>0.0547</b> | <b>0.0573</b> | <b>0.0228</b> |          | LGGM-FT | <b>0.0204</b> | <b>0.2347</b> | <b>0.0404</b> | <b>0.2100</b> |
| POWER  | DiGress | 0.0348        | 0.3174        | 0.1083        | 0.1393        | CITATION | DiGress | 0.0217        | 0.1566        | 0.0645        | 0.1235        |
|        | LGGM-FT | <b>0.0077</b> | <b>0.0570</b> | <b>0.0134</b> | <b>0.0040</b> |          | LGGM-FT | <b>0.0052</b> | <b>0.0821</b> | <b>0.0221</b> | <b>0.0443</b> |
| All    | DiGress | 0.0366        | 0.1761        | 0.0707        | 0.1042        |          | DiGress |               |               |               |               |
|        | LGGM-FT | <b>0.0218</b> | <b>0.1120</b> | <b>0.0324</b> | <b>0.0568</b> |          | LGGM-FT |               |               |               |               |

## F.4 DOMAIN TRANSFERABILITY ANALYSIS

Table 14: Transferability analysis between Chemistry (CHEM) and Society (SOC) domains. The pre-trained LGGM on chemistry demonstrates negative transferability on IMDB-BINARY/MULTI graphs in the SOC domain. LGGM pre-trained on society demonstrates negative transferability on graphs PROTEINS/ENZYMES/MUTAG in CHEM domain.

| Domain  | Chemistry |        |         |        |        |        | Social      |        |            |        |
|---------|-----------|--------|---------|--------|--------|--------|-------------|--------|------------|--------|
| Dataset | PROTEINS  |        | ENZYMES |        | MUTAG  |        | IMDB-BINARY |        | IMDB-MULTI |        |
| Metric  | Orb       | CC     | Orb     | CC     | Orb    | CC     | Orb         | CC     | Orb        | CC     |
| CHEM    | 0.0604    | 0.0297 | 0.0593  | 0.0534 | 0.0445 | 0.0340 | 0.9001      | 0.4085 | 0.5511     | 0.6324 |
| SOC     | 0.6997    | 0.0890 | 0.8028  | 0.0422 | 0.5022 | 0.9439 | 0.1526      | 0.2247 | 0.0605     | 0.0945 |

## F.5 EQUIPPING LARGE-SCALE TRAINING PARADIGM WITH ANOTHER GRAPH GENERATIVE BACKBONE EDGE

Table 15: Comparing Graph Generation Performance between EDGE and EDGE equipped with LGGM on each domain. We can still see the performance boost after equipping EDGE with our large-scale training paradigm.

| Domain | Method | DEG           | CC            | Spec          | Orb           | Domain   | Method | DEG           | CC            | Spec          | Orb           |
|--------|--------|---------------|---------------|---------------|---------------|----------|--------|---------------|---------------|---------------|---------------|
| FB     | EDGE   | 0.0031        | <b>0.0609</b> | 0.0079        | 0.0362        | BIO      | EDGE   | 0.0126        | <b>0.0555</b> | <b>0.0484</b> | 0.0612        |
|        | LGGM   | <b>0.0022</b> | 0.0657        | <b>0.0073</b> | <b>0.0354</b> |          | LGGM   | <b>0.0120</b> | 0.0669        | 0.0502        | <b>0.0590</b> |
| ASN    | EDGE   | 0.0212        | 0.1416        | 0.1145        | 0.1652        | ECON     | EDGE   | <b>0.0416</b> | <b>0.0398</b> | <b>0.0078</b> | <b>0.0364</b> |
|        | LGGM   | <b>0.0146</b> | <b>0.0783</b> | <b>0.0724</b> | <b>0.1285</b> |          | LGGM   | 0.0519        | 0.0817        | 0.0665        | 0.0551        |
| EMAIL  | EDGE   | 0.0118        | 0.0661        | 0.0249        | 0.0771        | RT       | EDGE   | 0.0340        | <b>0.1760</b> | 0.1242        | <b>0.0331</b> |
|        | LGGM   | <b>0.0081</b> | <b>0.0519</b> | <b>0.0237</b> | <b>0.0691</b> |          | LGGM   | <b>0.0288</b> | 0.3088        | <b>0.0366</b> | 0.0938        |
| WEB    | EDGE   | <b>0.0132</b> | <b>0.1062</b> | 0.1094        | 0.1950        | COL      | EDGE   | 0.0042        | <b>0.2161</b> | 0.1325        | <b>0.3049</b> |
|        | LGGM   | 0.1225        | 0.1283        | <b>0.0976</b> | <b>0.1840</b> |          | LGGM   | <b>0.0026</b> | 0.3058        | <b>0.1285</b> | 0.3104        |
| ROAD   | EDGE   | 0.0254        | 0.1314        | 0.1313        | 0.1065        | ECO      | EDGE   | 0.0367        | 0.2424        | 0.0665        | <b>0.2156</b> |
|        | LGGM   | <b>0.0222</b> | <b>0.0624</b> | <b>0.1242</b> | <b>0.0867</b> |          | LGGM   | <b>0.0197</b> | <b>0.2406</b> | <b>0.0349</b> | <b>0.2156</b> |
| POWER  | EDGE   | 0.1417        | 0.2811        | 0.2568        | 0.4298        | CITATION | EDGE   | 0.0124        | 0.0962        | 0.0460        | 0.0438        |
|        | LGGM   | <b>0.1276</b> | <b>0.2276</b> | <b>0.2548</b> | <b>0.3549</b> |          | LGGM   | <b>0.0073</b> | <b>0.0947</b> | <b>0.0448</b> | <b>0.0458</b> |

## F.6 TEXT-TO-GRAPH GENERATION

## F.6.1 DOMAIN SPECIFIC TRANSITION

Table 16: Comparing the performance of graph generation between LGGM trained on graphs from all domains with and without domain/name as textual conditions.

| Domain | Method                 | DEG           | CC            | Spec          | Orb           | Domain   | Method                 | DEG           | CC            | Spec          | Orb           |
|--------|------------------------|---------------|---------------|---------------|---------------|----------|------------------------|---------------|---------------|---------------|---------------|
| FB     | LGGM                   | 0.2566        | 0.3552        | <u>0.0587</u> | 0.1614        | BIO      | LGGM                   | 0.2860        | <u>0.3275</u> | <u>0.1117</u> | <u>0.2333</u> |
|        | LGGM-T2G <sup>D</sup>  | <u>0.1533</u> | <u>0.1894</u> | 0.0817        | <u>0.0492</u> |          | LGGM-T2G <sup>D</sup>  | <u>0.1313</u> | 0.5111        | 0.1340        | 0.3736        |
|        | LGGM-T2G <sup>UP</sup> | <b>0.0053</b> | <b>0.0576</b> | <b>0.0076</b> | <b>0.0245</b> |          | LGGM-T2G <sup>UP</sup> | <b>0.0219</b> | <b>0.0251</b> | <b>0.0126</b> | <b>0.0190</b> |
| ASN    | LGGM                   | 0.1477        | <u>0.3003</u> | 0.1551        | 0.3719        | ECON     | LGGM                   | 0.3540        | 0.3404        | 0.2078        | 0.2740        |
|        | LGGM-T2G <sup>D</sup>  | <u>0.0429</u> | 0.4742        | <u>0.0949</u> | <u>0.0401</u> |          | LGGM-T2G <sup>D</sup>  | <u>0.2346</u> | <u>0.1572</u> | <u>0.1550</u> | <b>0.0579</b> |
|        | LGGM-T2G <sup>UP</sup> | <b>0.0161</b> | <b>0.1312</b> | <b>0.0344</b> | <b>0.0174</b> |          | LGGM-T2G <sup>UP</sup> | <b>0.0869</b> | <b>0.0601</b> | <b>0.0412</b> | <u>0.0592</u> |
| EMAIL  | LGGM                   | 0.1957        | <u>0.2629</u> | <u>0.0646</u> | <u>0.2118</u> | RT       | LGGM                   | 0.4355        | 0.3924        | 0.4329        | 0.4966        |
|        | LGGM-T2G <sup>D</sup>  | <u>0.0874</u> | 0.3238        | 0.1472        | 0.2869        |          | LGGM-T2G <sup>D</sup>  | <u>0.0050</u> | <u>0.0940</u> | <u>0.0415</u> | <u>0.2870</u> |
|        | LGGM-T2G <sup>UP</sup> | <b>0.0077</b> | <b>0.0316</b> | <b>0.0176</b> | <b>0.0365</b> |          | LGGM-T2G <sup>UP</sup> | <b>0.0034</b> | <b>0.0253</b> | <b>0.0225</b> | <b>0.0869</b> |
| WEB    | LGGM                   | 0.2461        | 0.3570        | 0.1853        | 0.4832        | COL      | LGGM                   | 0.2616        | <b>0.3398</b> | 0.2305        | 0.7090        |
|        | LGGM-T2G <sup>D</sup>  | <u>0.1253</u> | <u>0.9088</u> | <u>0.1156</u> | <u>0.3884</u> |          | LGGM-T2G <sup>D</sup>  | <u>0.1301</u> | 0.9384        | <u>0.1963</u> | <u>0.2032</u> |
|        | LGGM-T2G <sup>UP</sup> | <b>0.0771</b> | <b>0.2720</b> | <b>0.0732</b> | <b>0.1251</b> |          | LGGM-T2G <sup>UP</sup> | <b>0.0845</b> | <u>0.5070</u> | <b>0.1378</b> | <b>0.1531</b> |
| ROAD   | LGGM                   | 0.4315        | 0.8107        | 0.3192        | 0.6976        | ECO      | LGGM                   | 0.4611        | 0.3108        | 0.1932        | 0.3468        |
|        | LGGM-T2G <sup>D</sup>  | <u>0.0112</u> | <u>0.1611</u> | <b>0.0298</b> | <u>0.0120</u> |          | LGGM-T2G <sup>D</sup>  | <b>0.0575</b> | <u>0.2976</u> | <u>0.0585</u> | <u>0.2580</u> |
|        | LGGM-T2G <sup>UP</sup> | <b>0.0097</b> | <b>0.1316</b> | <u>0.0324</u> | <b>0.0119</b> |          | LGGM-T2G <sup>UP</sup> | <u>0.1070</u> | <b>0.2913</b> | <b>0.0410</b> | <b>0.2556</b> |
| POWER  | LGGM                   | 0.4411        | <b>0.4694</b> | 0.3384        | 1.3222        | CITATION | LGGM                   | 0.3392        | <u>0.5009</u> | <u>0.1295</u> | <u>0.2248</u> |
|        | LGGM-T2G <sup>D</sup>  | <b>0.0194</b> | 0.6031        | <b>0.0286</b> | <b>0.0193</b> |          | LGGM-T2G <sup>D</sup>  | <u>0.1636</u> | 0.8868        | 0.2036        | 0.6142        |
|        | LGGM-T2G <sup>UP</sup> | <u>0.0227</u> | <u>0.4817</u> | <u>0.0330</u> | <u>0.0223</u> |          | LGGM-T2G <sup>UP</sup> | <b>0.0496</b> | <b>0.0914</b> | <b>0.0669</b> | <b>0.0318</b> |
| ALL    | LGGM                   | 0.3213        | <u>0.3973</u> | 0.2022        | 0.4610        |          |                        |               |               |               |               |
|        | LGGM-T2G <sup>D</sup>  | <u>0.0968</u> | 0.4621        | <u>0.1072</u> | 0.2158        |          |                        |               |               |               |               |
|        | LGGM-T2G <sup>UP</sup> | <b>0.0410</b> | <b>0.1755</b> | <b>0.0434</b> | <b>0.0703</b> |          |                        |               |               |               |               |

## F.6.2 UNIFORM TRANSITION

Table 17: Comparing the performance of graph generation between LGGM trained on graphs from all domains with and without domain/name as textual conditions.

| Domain | Method                 | DEG           | CC            | Spec          | Orb           | Domain   | Method                 | DEG           | CC            | Spec          | Orb           |
|--------|------------------------|---------------|---------------|---------------|---------------|----------|------------------------|---------------|---------------|---------------|---------------|
| FB     | LGGM                   | <u>0.0321</u> | 0.4994        | 0.0763        | 0.3117        | BIO      | LGGM                   | 0.2661        | 0.3120        | 0.1135        | 0.3835        |
|        | LGGM-T2G <sup>D</sup>  | <u>0.1561</u> | <u>0.1639</u> | <u>0.0924</u> | <u>0.0417</u> |          | LGGM-T2G <sup>D</sup>  | <u>0.0099</u> | <u>0.1286</u> | <u>0.0303</u> | <u>0.1366</u> |
|        | LGGM-T2G <sup>UP</sup> | <b>0.0050</b> | <b>0.0545</b> | <b>0.0070</b> | <b>0.0251</b> |          | LGGM-T2G <sup>UP</sup> | <b>0.0028</b> | <b>0.0287</b> | <b>0.0236</b> | <b>0.0174</b> |
| ASN    | LGGM                   | 0.1511        | 0.4325        | 0.1875        | 0.3896        | ECON     | LGGM                   | 0.3828        | 0.1533        | 0.2039        | 0.2583        |
|        | LGGM-T2G <sup>D</sup>  | <u>0.0318</u> | <u>0.2821</u> | <u>0.0606</u> | <u>0.0631</u> |          | LGGM-T2G <sup>D</sup>  | <u>0.0666</u> | <u>0.0594</u> | <u>0.0650</u> | <u>0.0586</u> |
|        | LGGM-T2G <sup>UP</sup> | <b>0.0211</b> | <b>0.1191</b> | <b>0.0462</b> | <b>0.0195</b> |          | LGGM-T2G <sup>UP</sup> | <b>0.0132</b> | <b>0.0257</b> | <b>0.0053</b> | <b>0.0191</b> |
| EMAIL  | LGGM                   | 0.2156        | 0.2450        | 0.0666        | 0.2757        | RT       | LGGM                   | 0.4395        | 0.2225        | 0.4337        | 0.6641        |
|        | LGGM-T2G <sup>D</sup>  | <u>0.0469</u> | <u>0.0982</u> | <u>0.0484</u> | <u>0.0505</u> |          | LGGM-T2G <sup>D</sup>  | <u>0.0468</u> | <u>0.0955</u> | <u>0.0729</u> | <u>0.0393</u> |
|        | LGGM-T2G <sup>UP</sup> | <b>0.0073</b> | <b>0.0379</b> | <b>0.0127</b> | <b>0.0437</b> |          | LGGM-T2G <sup>UP</sup> | <b>0.0286</b> | <b>0.0933</b> | <b>0.0400</b> | <b>0.0312</b> |
| WEB    | LGGM                   | 0.2725        | 0.2672        | 0.1900        | 0.4368        | COL      | LGGM                   | 0.3565        | 0.3554        | 0.2451        | 0.7874        |
|        | LGGM-T2G <sup>D</sup>  | <u>0.0255</u> | <b>0.0737</b> | <u>0.0354</u> | <u>0.1856</u> |          | LGGM-T2G <sup>D</sup>  | <u>0.0395</u> | <u>0.3110</u> | <u>0.1146</u> | <u>0.1823</u> |
|        | LGGM-T2G <sup>UP</sup> | <b>0.0105</b> | <u>0.0941</u> | <b>0.0206</b> | <b>0.0451</b> |          | LGGM-T2G <sup>UP</sup> | <b>0.0265</b> | <b>0.2813</b> | <b>0.0895</b> | <b>0.0899</b> |
| ROAD   | LGGM                   | 0.4825        | 0.5373        | 0.3398        | 0.7542        | ECO      | LGGM                   | 0.5466        | 0.6003        | 0.2257        | 0.7089        |
|        | LGGM-T2G <sup>D</sup>  | <b>0.0088</b> | <u>0.1225</u> | <u>0.0399</u> | <u>0.0155</u> |          | LGGM-T2G <sup>D</sup>  | <u>0.2160</u> | <u>0.2917</u> | <u>0.1203</u> | <u>0.2569</u> |
|        | LGGM-T2G <sup>UP</sup> | <u>0.0177</u> | <b>0.0437</b> | <b>0.0336</b> | <b>0.0086</b> |          | LGGM-T2G <sup>UP</sup> | <b>0.0293</b> | <b>0.2885</b> | <b>0.0416</b> | <b>0.2556</b> |
| POWER  | LGGM                   | 0.4394        | 0.4646        | 0.3473        | 1.3186        | CITATION | LGGM                   | 0.2624        | 0.5374        | 0.1295        | 0.3419        |
|        | LGGM-T2G <sup>D</sup>  | <u>0.0162</u> | <u>0.1131</u> | <u>0.0479</u> | <u>0.1786</u> |          | LGGM-T2G <sup>D</sup>  | <u>0.0101</u> | <u>0.1025</u> | <u>0.0315</u> | <u>0.0651</u> |
|        | LGGM-T2G <sup>UP</sup> | <b>0.0062</b> | <b>0.0570</b> | <b>0.0111</b> | <b>0.0084</b> |          | LGGM-T2G <sup>UP</sup> | <b>0.0072</b> | <b>0.0849</b> | <b>0.0115</b> | <b>0.0287</b> |
| ALL    | LGGM                   | 0.3206        | 0.3856        | 0.2132        | 0.5526        |          |                        |               |               |               |               |
|        | LGGM-T2G <sup>D</sup>  | <u>0.0562</u> | <u>0.1535</u> | <u>0.0633</u> | <u>0.1061</u> |          |                        |               |               |               |               |
|        | LGGM-T2G <sup>UP</sup> | <b>0.0146</b> | <b>0.1007</b> | <b>0.0286</b> | <b>0.0494</b> |          |                        |               |               |               |               |

### F.7 SENSITIVE ANALYSIS ON NUMBER OF TRAINING DATA UNDER DOMAIN SPECIFIC TRANSITION

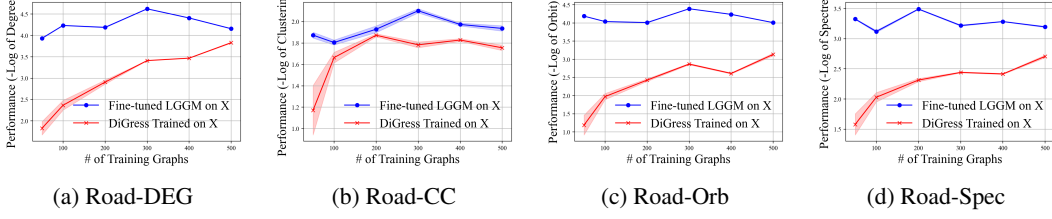

Figure 9: Effect of Number of Training Graphs on Road Networks.

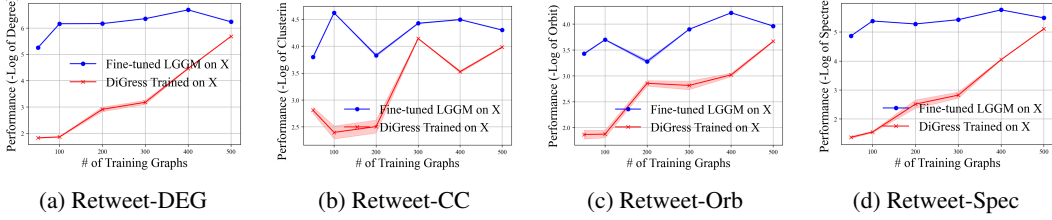

Figure 10: Effect of Number of Training Graphs on Retweet Networks.

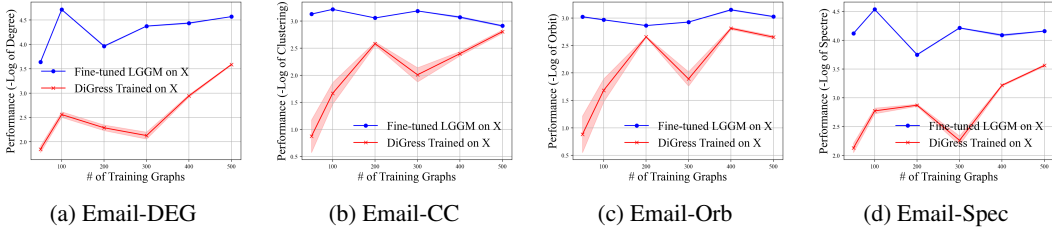

Figure 11: Effect of Number of Training Graphs on Email Networks.

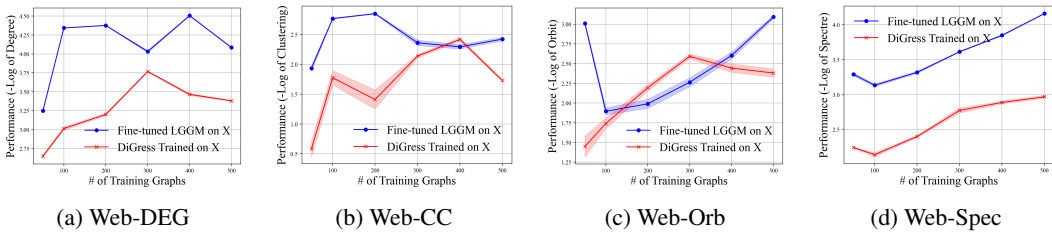

Figure 12: Effect of Number of Training Graphs on Web Graphs.

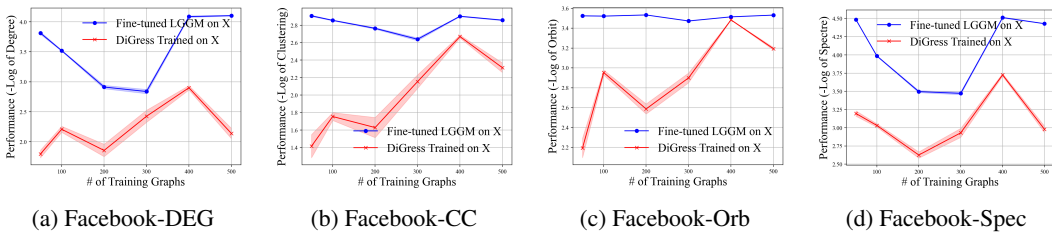

Figure 13: Effect of Number of Training Graphs on Facebook Networks.

### F.8 SENSITIVE ANALYSIS ON NUMBER OF TRAINING DATA UNDER UNIFORM TRANSITION STRATEGY

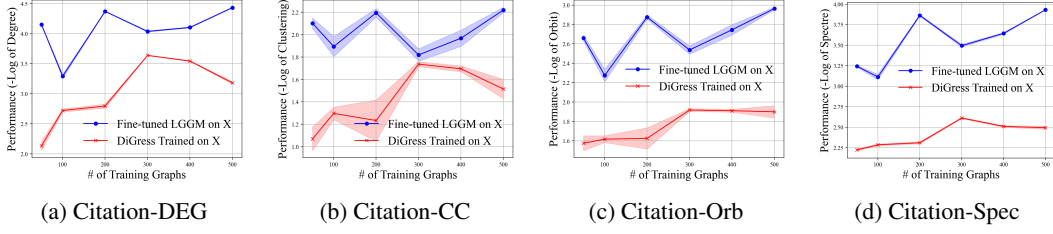

Figure 14: Effect of Number of Training Graphs on Citation Networks.

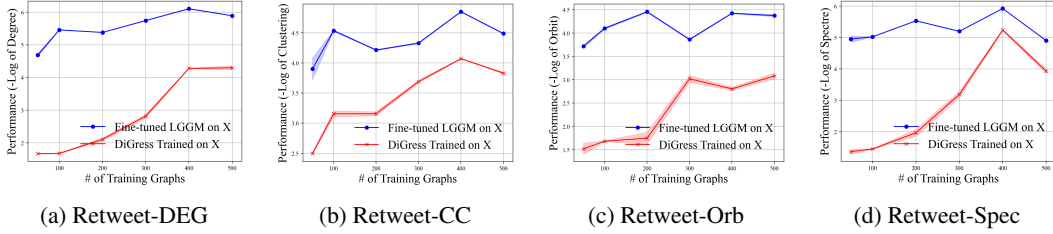

Figure 15: Effect of Number of Training Graphs on Retweet Networks.

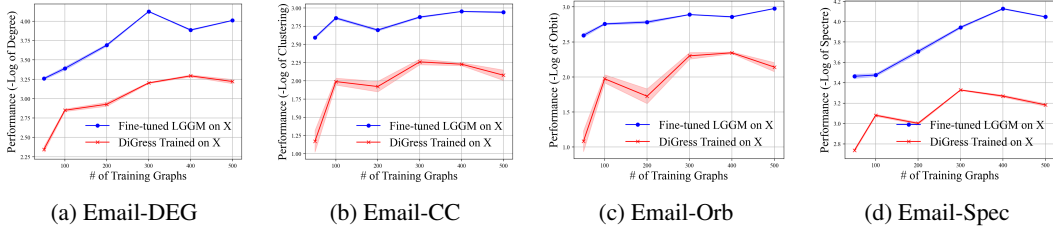

Figure 16: Effect of Number of Training Graphs on Email Networks.

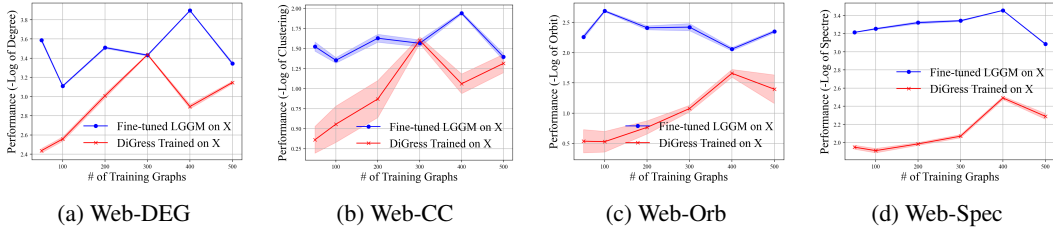

Figure 17: Effect of Number of Training Graphs on Web Graphs.

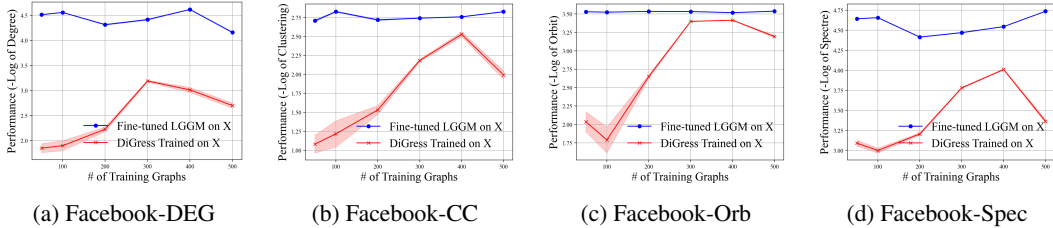

Figure 18: Effect of Number of Training Graphs on Facebook Networks.

## F.9 COMPARING THE DOMAIN AS THE TEXTUAL CONDITION BEFORE/AFTER SHUFFLING

## F.9.1 DOMAIN SPECIFIC TRANSITION

Table 18: Comparing the performance of graph generation between LGGM trained on graphs from all domains with and without domain/name as textual conditions under domain-specific transition.

| Domain | Method                 | DEG           | CC            | Spec          | Orb           | Domain   | Method                 | DEG           | CC            | Spec          | Orb           |
|--------|------------------------|---------------|---------------|---------------|---------------|----------|------------------------|---------------|---------------|---------------|---------------|
| FB     | LGGM-T2G <sup>D</sup>  | <b>0.1533</b> | <b>0.1894</b> | <b>0.0817</b> | <b>0.0492</b> | BIO      | LGGM-T2G <sup>D</sup>  | <b>0.1313</b> | <b>0.5111</b> | <b>0.1340</b> | <b>0.3736</b> |
|        | LGGM-T2G <sup>D*</sup> | 0.2323        | 0.2618        | 0.1590        | 0.0923        |          | LGGM-T2G <sup>D*</sup> | 0.1762        | 0.5887        | 0.1460        | 0.4929        |
| ASN    | LGGM-T2G <sup>D</sup>  | <b>0.0429</b> | <b>0.4742</b> | <b>0.0949</b> | <b>0.0401</b> | ECON     | LGGM-T2G <sup>D</sup>  | 0.2346        | <b>0.1572</b> | <b>0.1550</b> | <b>0.0579</b> |
|        | LGGM-T2G <sup>D*</sup> | 0.0891        | 0.5725        | 0.1446        | 0.0610        |          | LGGM-T2G <sup>D*</sup> | <b>0.2029</b> | 0.3393        | 0.2298        | 0.0579        |
| EMAIL  | LGGM-T2G <sup>D</sup>  | <b>0.0874</b> | <b>0.3238</b> | <b>0.1472</b> | <b>0.2869</b> | RT       | LGGM-T2G <sup>D</sup>  | <b>0.0050</b> | <b>0.0940</b> | <b>0.0415</b> | <b>0.2870</b> |
|        | LGGM-T2G <sup>D*</sup> | 0.2169        | 0.7497        | 0.2825        | 0.8397        |          | LGGM-T2G <sup>D*</sup> | 0.0240        | 0.1023        | 0.1374        | 0.4123        |
| WEB    | LGGM-T2G <sup>D</sup>  | <b>0.1253</b> | <b>0.9088</b> | <b>0.1156</b> | <b>0.3884</b> | COL      | LGGM-T2G <sup>D</sup>  | <b>0.1301</b> | <b>0.9384</b> | <b>0.1963</b> | <b>0.2032</b> |
|        | LGGM-T2G <sup>D*</sup> | 0.1464        | 0.9776        | 0.1460        | 0.4211        |          | LGGM-T2G <sup>D*</sup> | 0.1529        | 0.9684        | 0.2313        | 0.2089        |
| ROAD   | LGGM-T2G <sup>D</sup>  | <b>0.0112</b> | <b>0.1611</b> | <b>0.0298</b> | <b>0.0120</b> | ECO      | LGGM-T2G <sup>D</sup>  | <b>0.0575</b> | <b>0.2976</b> | <b>0.0585</b> | 0.2580        |
|        | LGGM-T2G <sup>D*</sup> | 0.0365        | 0.2430        | 0.0605        | 0.0500        |          | LGGM-T2G <sup>D*</sup> | 0.1964        | 0.3330        | 0.1438        | <b>0.2574</b> |
| POWER  | LGGM-T2G <sup>D</sup>  | <b>0.0194</b> | <b>0.6031</b> | <b>0.0286</b> | <b>0.0193</b> | CITATION | LGGM-T2G <sup>D</sup>  | 0.1636        | <b>0.8868</b> | 0.2036        | 0.6142        |
|        | LGGM-T2G <sup>D*</sup> | 0.0434        | 0.6721        | 0.0626        | 0.0231        |          | LGGM-T2G <sup>D*</sup> | <b>0.1615</b> | 0.9553        | <b>0.1903</b> | <b>0.6078</b> |
| ALL    | LGGM-T2G <sup>D</sup>  | <b>0.0968</b> | <b>0.4621</b> | <b>0.1072</b> | <b>0.2158</b> |          |                        |               |               |               |               |
|        | LGGM-T2G <sup>D*</sup> | 0.1399        | 0.5636        | 0.1611        | 0.2937        |          |                        |               |               |               |               |

## F.9.2 UNIFORM TRANSITION

Table 19: Comparing the performance of graph generation between LGGM trained on graphs from all domains with and without domain/name as textual conditions under uniform transition strategy.

| Domain | Method                 | DEG           | CC            | Spec          | Orb           | Domain   | Method                 | DEG           | CC            | Spec          | Orb           |
|--------|------------------------|---------------|---------------|---------------|---------------|----------|------------------------|---------------|---------------|---------------|---------------|
| FB     | LGGM-T2G <sup>D</sup>  | <b>0.1561</b> | <b>0.1639</b> | <b>0.0924</b> | <b>0.0417</b> | BIO      | LGGM-T2G <sup>D</sup>  | <b>0.0099</b> | <b>0.1286</b> | <b>0.0303</b> | <b>0.1366</b> |
|        | LGGM-T2G <sup>D*</sup> | 0.3018        | 0.4207        | 0.2069        | 0.2622        |          | LGGM-T2G <sup>D*</sup> | 0.0754        | 0.2889        | 0.0881        | 0.2783        |
| ASN    | LGGM-T2G <sup>D</sup>  | <b>0.0318</b> | 0.2821        | <b>0.0606</b> | <b>0.0631</b> | ECON     | LGGM-T2G <sup>D</sup>  | <b>0.0665</b> | <b>0.0594</b> | <b>0.0650</b> | <b>0.0586</b> |
|        | LGGM-T2G <sup>D*</sup> | 0.0637        | <b>0.1561</b> | 0.1416        | 0.2351        |          | LGGM-T2G <sup>D*</sup> | 0.1035        | 0.0736        | 0.0971        | 0.0922        |
| EMAIL  | LGGM-T2G <sup>D</sup>  | <b>0.0469</b> | <b>0.0982</b> | <b>0.0484</b> | <b>0.0505</b> | RT       | LGGM-T2G <sup>D</sup>  | <b>0.0468</b> | <b>0.0955</b> | <b>0.0729</b> | <b>0.0393</b> |
|        | LGGM-T2G <sup>D*</sup> | 0.1107        | 0.2322        | 0.1315        | 0.1692        |          | LGGM-T2G <sup>D*</sup> | 0.1399        | 0.3913        | 0.2441        | 0.2497        |
| WEB    | LGGM-T2G <sup>D</sup>  | <b>0.0255</b> | <b>0.0737</b> | <b>0.0354</b> | <b>0.1856</b> | COL      | LGGM-T2G <sup>D</sup>  | <b>0.0395</b> | <b>0.3110</b> | <b>0.1146</b> | <b>0.1823</b> |
|        | LGGM-T2G <sup>D*</sup> | 0.0485        | 0.0830        | 0.1340        | 0.2669        |          | LGGM-T2G <sup>D*</sup> | 0.0323        | 0.4972        | 0.1159        | 0.5375        |
| ROAD   | LGGM-T2G <sup>D</sup>  | <b>0.0088</b> | 0.1225        | <b>0.0399</b> | <b>0.0155</b> | ECO      | LGGM-T2G <sup>D</sup>  | <b>0.2160</b> | <b>0.2917</b> | <b>0.1203</b> | <b>0.2569</b> |
|        | LGGM-T2G <sup>D*</sup> | 0.0453        | <b>0.1005</b> | 0.1257        | 0.3803        |          | LGGM-T2G <sup>D*</sup> | 0.3722        | 0.3210        | 0.2226        | 0.2771        |
| POWER  | LGGM-T2G <sup>D</sup>  | <b>0.0162</b> | <b>0.1131</b> | <b>0.0479</b> | <b>0.1786</b> | CITATION | LGGM-T2G <sup>D</sup>  | <b>0.0101</b> | <b>0.1025</b> | <b>0.0315</b> | <b>0.0651</b> |
|        | LGGM-T2G <sup>D*</sup> | 0.0225        | 0.1533        | 0.1264        | 0.2957        |          | LGGM-T2G <sup>D*</sup> | 0.0375        | 0.2454        | 0.0699        | 0.1363        |
| ALL    | LGGM-T2G <sup>D</sup>  | <b>0.0562</b> | <b>0.1535</b> | <b>0.0633</b> | <b>0.1061</b> |          |                        |               |               |               |               |
|        | LGGM-T2G <sup>D*</sup> | 0.1128        | 0.2469        | 0.1420        | 0.2650        |          |                        |               |               |               |               |
